# Supplementary material for: Ciclopirox Olamine Induces Ferritinophagy and Ameliorates Disease Progression in Polycystic Kidney Disease
Source: Preprints.org preprint supplement (doi:10.20944/preprints202002.0416.v1), 2020-02-28

Supplementary figure legends:

Figure1: **Effect of CPX on cell viability.** ADPKD or NHK cells were plated in a 12 well plate (20,000 cells/well) and allowed to grow overnight. Cells were treated with either vehicle control (referred to as 0) or increasing doses of CPX-O for 24 hours. Cells were evaluated for viability in 96 well plate in triplicates using a cell counting kit. Assays were performed in primary cells from at least three NHK and three ADPKD kidneys.

Figure2: **CPX reduces overall renal fibrotic areas in PKD mice.(A)**

Immunohistochemistry for detection of smooth muscle actin shows increased labeling in fibrous tissue surrounding the smooth muscle cells in PKD mouse sections, treatment with CPX-O treated with CPX-O reduced these effects. **(B)** Mason Trichrome staining detecting collagenous stroma and myofibroblastic cells (blue colored) in renal tissues of PKD mice, CPX-O treatment effectively reduced the fibrotic area.

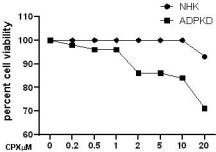

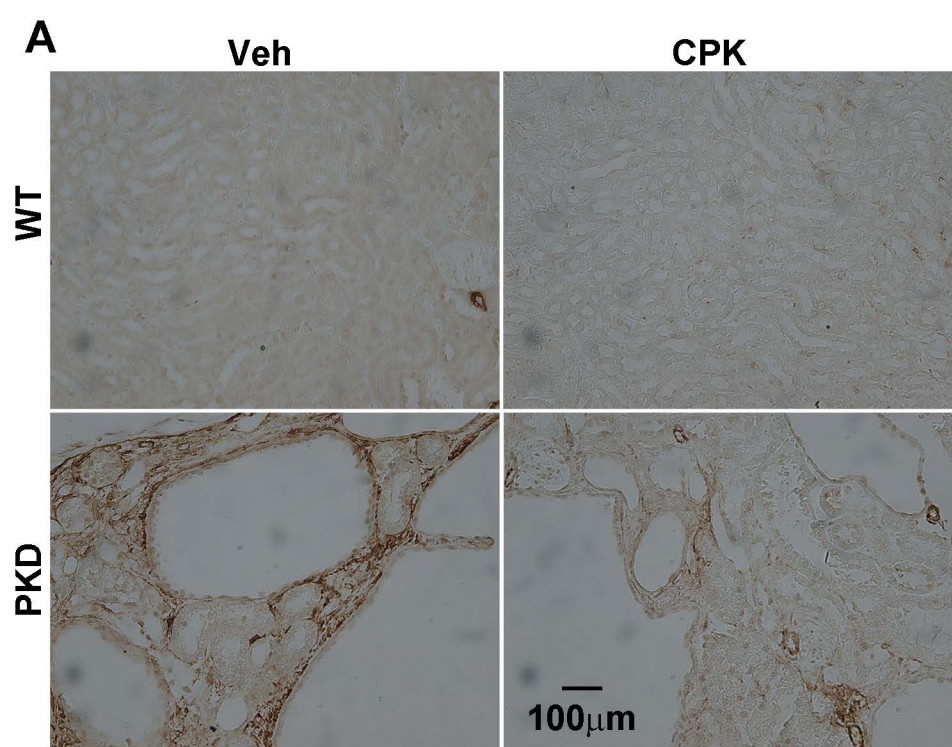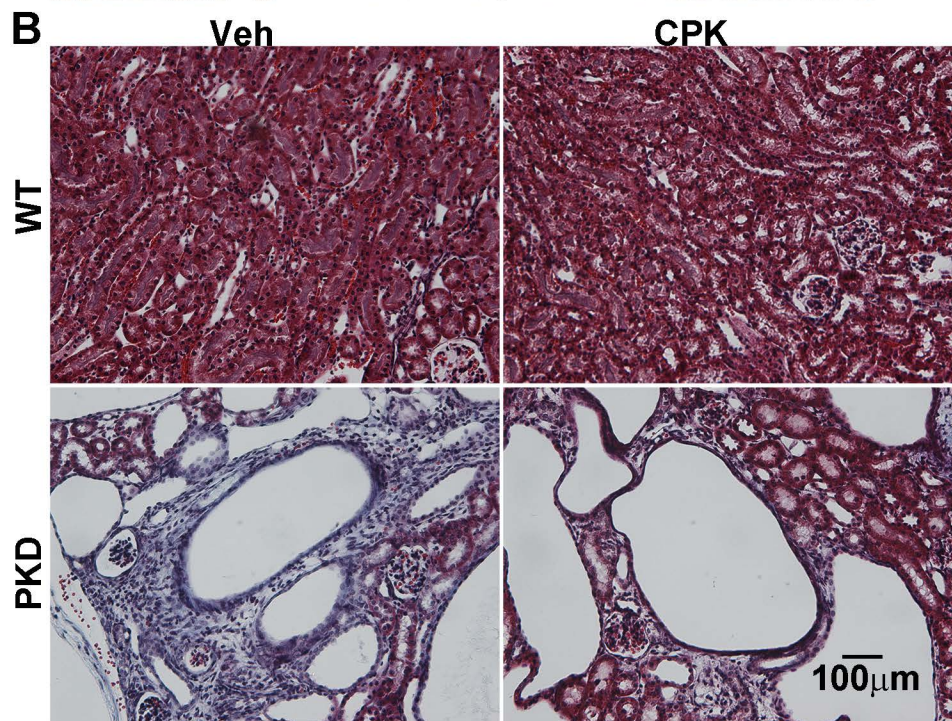

Supplement: Supplementary file 1 [file supplementary]
